# Supplementary material for: Paravertebral Muscle Training in Patients with Unstable Spinal Metastases Receiving Palliative Radiotherapy: An Exploratory Randomized Feasibility Trial
Source: MDPI journal article supplement (doi:10.3390/cancers11111771), 2019-11-11
Supplement: s1 [file s1]

**Table S1.** CONSORT 2010 checklist to reporting feasibility trial.

| Section/Topic             | Item No | Checklist item                                                                                                                                      | Reported on page No |
|---------------------------|---------|-----------------------------------------------------------------------------------------------------------------------------------------------------|---------------------|
| <b>Title and abstract</b> |         |                                                                                                                                                     |                     |
|                           | 1a      | Identification as a pilot or feasibility randomised trial in the title                                                                              | 1                   |
|                           | 1b      | Structured summary of pilot trial design, methods, results, and conclusions (for specific guidance see CONSORT abstract extension for pilot trials) | 1                   |
| <b>Introduction</b>       |         |                                                                                                                                                     |                     |
| Background and objectives | 2a      | Scientific background and explanation of rationale for future definitive trial, and reasons for randomised pilot trial                              | 6-7                 |
|                           | 2b      | Specific objectives or research questions for pilot trial                                                                                           | 7                   |
| <b>Methods</b>            |         |                                                                                                                                                     |                     |
| Trial design              | 3a      | Description of pilot trial design (such as parallel, factorial) including allocation ratio                                                          | 7-8                 |
|                           | 3b      | Important changes to methods after pilot trial commencement (such as eligibility criteria), with reasons                                            |                     |
| Participants              | 4a      | Eligibility criteria for participants                                                                                                               | 8                   |

|                     |    |                                                                                                                                                              |              |
|---------------------|----|--------------------------------------------------------------------------------------------------------------------------------------------------------------|--------------|
|                     | 4b | Settings and locations where the data were collected                                                                                                         | 5            |
|                     | 4c | How participants were identified and consented                                                                                                               | 8            |
| Interventions       | 5  | The interventions for each group with sufficient details to allow replication, including how and when they were actually administered                        | 8-9          |
| Outcomes            | 6a | Completely defined prespecified assessments or measurements to address each pilot trial objective specified in 2b, including how and when they were assessed | 9-10         |
|                     | 6b | Any changes to pilot trial assessments or measurements after the pilot trial commenced, with reasons                                                         | Not required |
|                     | 6c | If applicable, prespecified criteria used to judge whether, or how, to proceed with future definitive trial                                                  | 15           |
| Sample size         | 7a | Rationale for numbers in the pilot trial                                                                                                                     | 10-11        |
|                     | 7b | When applicable, explanation of any interim analyses and stopping guidelines                                                                                 | Not required |
| Randomisation:      |    |                                                                                                                                                              |              |
| Sequence generation | 8a | Method used to generate the random allocation sequence                                                                                                       | 10           |
|                     | 8b | Type of randomisation(s); details of any restriction (such as blocking and block size)                                                                       | 10           |

|                                                      |     |                                                                                                                                                                                             |          |
|------------------------------------------------------|-----|---------------------------------------------------------------------------------------------------------------------------------------------------------------------------------------------|----------|
| Allocation concealment mechanism                     | 9   | Mechanism used to implement the random allocation sequence (such as sequentially numbered containers), describing any steps taken to conceal the sequence until interventions were assigned | 10       |
| Implementation                                       | 10  | Who generated the random allocation sequence, who enrolled participants, and who assigned participants to interventions                                                                     | 10, [23] |
| Blinding                                             | 11a | If done, who was blinded after assignment to interventions (for example, participants, care providers, those assessing outcomes) and how                                                    | Not done |
|                                                      | 11b | If relevant, description of the similarity of interventions                                                                                                                                 | Not done |
| Statistical methods                                  | 12  | Methods used to address each pilot trial objective whether qualitative or quantitative                                                                                                      | 10       |
| <b>Results</b>                                       |     |                                                                                                                                                                                             |          |
| Participant flow (a diagram is strongly recommended) | 13a | For each group, the numbers of participants who were approached and/or assessed for eligibility, randomly assigned, received intended treatment, and were assessed for each objective       | 11       |
|                                                      | 13b | For each group, losses and exclusions after randomisation, together with reasons                                                                                                            | 11       |

|                         |     |                                                                                                                                                                                |              |
|-------------------------|-----|--------------------------------------------------------------------------------------------------------------------------------------------------------------------------------|--------------|
| ed)                     |     |                                                                                                                                                                                |              |
| Recruitment             | 14a | Dates defining the periods of recruitment and follow-up                                                                                                                        | 8            |
|                         | 14b | Why the pilot trial ended or was stopped                                                                                                                                       | Not required |
| Baseline data           | 15  | A table showing baseline demographic and clinical characteristics for each group                                                                                               | 11           |
| Numbers analysed        | 16  | For each objective, number of participants (denominator) included in each analysis. If relevant, these numbers should be by randomised group                                   | 11-13        |
| Outcomes and estimation | 17  | For each objective, results including expressions of uncertainty (such as 95% confidence interval) for any estimates. If relevant, these results should be by randomised group | 11-13        |
| Ancillary analyses      | 18  | Results of any other analyses performed that could be used to inform the future definitive trial                                                                               | 11-13        |
| Harms                   | 19  | All important harms or unintended effects in each group (for specific guidance see CONSORT for harms)                                                                          | 11-12        |
|                         | 19a | If relevant, other important unintended consequences                                                                                                                           | 11-12        |
| <b>Discussion</b>       |     |                                                                                                                                                                                |              |
| Limitations             | 20  | Pilot trial limitations, addressing sources of potential bias and remaining uncertainty about feasibility                                                                      | 13-15        |

|                          |     |                                                                                                                                                     |       |
|--------------------------|-----|-----------------------------------------------------------------------------------------------------------------------------------------------------|-------|
| Generalisability         | 21  | Generalisability (applicability) of pilot trial methods and findings to future definitive trial and other studies                                   | 13-15 |
| Interpretation           | 22  | Interpretation consistent with pilot trial objectives and findings, balancing potential benefits and harms, and considering other relevant evidence | 13-15 |
|                          | 22a | Implications for progression from pilot to future definitive trial, including any proposed amendments                                               | 15    |
| <b>Other information</b> |     |                                                                                                                                                     |       |
| Registration             | 23  | Registration number for pilot trial and name of trial registry                                                                                      | 5     |
| Protocol                 | 24  | Where the pilot trial protocol can be accessed, if available                                                                                        | [23]  |
| Funding                  | 25  | Sources of funding and other support (such as supply of drugs), role of funders                                                                     | 5     |
|                          | 26  | Ethical approval or approval by research review committee, confirmed with reference number                                                          | 5     |
